# Supplementary material for: Ascorbic acid enhances the cardiac differentiation of induced pluripotent stem cells through promoting the proliferation of cardiac progenitor cells
Source: Springer Nature journal article supplement (doi:10.1038/cr.2011.195), 2011-12-06
Supplement: 41422_2012_BFcr2011195_MOESM304_ESM.pdf [file 41422_2012_BFcr2011195_MOESM304_ESM.pdf]

**Supplementary information, Table S1** iPSC lines used in this study

| Cell lines        | Species | Factors | Gene delivery methods | Original cell types | Reference |
|-------------------|---------|---------|-----------------------|---------------------|-----------|
| iPS-R-B1 (iPS-3F) | mouse   | 3F      | Retrovirus            | MEFs                | -         |
| iPS-R-C1          | mouse   | 4F      | Retrovirus            | MEFs                | -         |
| iPS-tet-B1        | mouse   | 4F      | Tet-on lentivirus     | MEFs                | [1]       |
| iPS-tet-B3        | mouse   | 4F      | Tet-on lentivirus     | MEFs                | [1]       |
| iPS 11.1          | mouse   | 4F      | Retrovirus            | NPCs                | [2]       |
| iPS-C5            | mouse   | 4F      | Retrovirus            | Meningeal cells     | [3]       |
| iPS-C12           | mouse   | 4F      | Retrovirus            | Meningeal cells     | [3]       |
| IP14D-1           | mouse   | 4F      | Retrovirus            | MEFs                | [4]       |
| IP14D-5           | mouse   | 4F      | Retrovirus            | MEFs                | [4]       |
| IP20D-3 (iPS-4F)  | mouse   | 4F      | Retrovirus            | MEFs                | [4]       |
| IP20D-19          | mouse   | 4F      | Retrovirus            | MEFs                | [4]       |
| hAFDC-iPS-36      | human   | 4F      | Retrovirus            | AFDCs               | [5]       |

3F, Oct4, Sox2, and Klf4; 4F, Oct4, Sox2, c-Myc and Klf4; MEFs, mouse embryonic fibroblasts; NPCs, neural progenitor cells; AFDCs, amniotic fluid-derived cells.

**Reference**

- 1 Huang J, Chen T, Liu X, *et al.* More synergetic cooperation of Yamanaka factors in induced pluripotent stem cells than in embryonic stem cells. *Cell Res* 2009; **19**:1127-38.
- 2 Li C, Yu H, Ma Y, *et al.* Germline-competent mouse-induced pluripotent stem cell lines generated on human fibroblasts without exogenous leukemia inhibitory factor. *PLoS One* 2009; **4**:e6724.
- 3 Qin D, Gan Y, Shao K, *et al.* Mouse meningeocytes express Sox2 and yield high efficiency of chimeras after nuclear reprogramming with exogenous factors. *J Biol Chem* 2008; **283**:33730-5.
- 4 Zhao XY, Li W, Lv Z, *et al.* iPS cells produce viable mice through tetraploid complementation. *Nature* 2009; **461**:86-90.
- 5 Li C, Zhou J, Shi G, *et al.* Pluripotency can be rapidly and efficiently induced in human amniotic fluid-derived cells. *Hum Mol Genet* 2009; **18**:4340-9.
