# Supplementary material for: Ascorbic acid enhances the cardiac differentiation of induced pluripotent stem cells through promoting the proliferation of cardiac progenitor cells
Source: Springer Nature journal article supplement (doi:10.1038/cr.2011.195), 2011-12-06
Supplement: 41422_2012_BFcr2011195_MOESM305_ESM.pdf [file 41422_2012_BFcr2011195_MOESM305_ESM.pdf]

**Supplementary information, Table S2** Action potential properties of iPS-CMs with or without AA-treatment

|        |     | N  | BF<br>(events/min) | APA<br>(mV) | V <sub>max</sub><br>(V/s) | MDP<br>(mV) | DD<br>(mV/s) | APD <sub>50</sub> (ms) |
|--------|-----|----|--------------------|-------------|---------------------------|-------------|--------------|------------------------|
| iPS-3F | Con | 27 | 25.6±3.9           | 72.7±2.2    | 3.1±0.2                   | -56.0±1.6   | 6.0±1.0      | 258.0±30.9             |
|        | AA  | 25 | 30.8±3.3           | 73.8±1.7    | 3.0±0.2                   | -57.0±0.9   | 13.3±3.8*    | 212.4±18.4             |
| iPS-4F | Con | 23 | 28.9±3.8           | 80.9±1.8    | 3.7±0.2                   | -60.3±0.9   | 7.4±0.8      | 298.6±41.6             |
|        | AA  | 29 | 30.2±3.4           | 85.0±2.0    | 4.2±0.2                   | -58.3±1.1   | 9.6±2.7      | 295.2±30.3             |

Data are presented as means±S.E.M. iPS-CMs, iPSC-derived cardiomyocytes; Con, control group; AA, ascorbic acid-applied group; AP, action potential; BF, beating frequency; APA, AP amplitude; V<sub>max</sub>, the maximum rate of rise of the AP; MDP, maximum diastolic potential; DD, rate of diastolic depolarization; APD<sub>50</sub>, AP duration at 50% of the amplitude; \*p<0.05 compared with the corresponding control group in Student's t-test.
