# Supplementary material for: Ascorbic acid enhances the cardiac differentiation of induced pluripotent stem cells through promoting the proliferation of cardiac progenitor cells
Source: Springer Nature journal article supplement (doi:10.1038/cr.2011.195), 2011-12-06
Supplement: 41422_2012_BFcr2011195_MOESM306_ESM.pdf [file 41422_2012_BFcr2011195_MOESM306_ESM.pdf]

**Supplementary information, Table S3 Primers used for RT-PCRs**

| Gene              | Primer Sequence (5' to 3')                                | AT (°C) | PS (bp) |
|-------------------|-----------------------------------------------------------|---------|---------|
| <i>endo-Oct4</i>  | F-TCAGCTTGGGCTAGAGAAGG<br>R-TGACGGGAACAGAGGGAAAG          | 60      | 254     |
| <i>endo-Sox2</i>  | F-GGCGGCAACCAGAAGAACAG<br>R-GTTGCTCCAGCCGTTTCATGTG        | 57      | 414     |
| <i>endo-Nanog</i> | F-TCTCCTCGCCCTTCCTCT<br>R-ATGCGTTCACCAGATAGCC             | 55      | 421     |
| <i>endo-c-Myc</i> | F-ATGCCCCTCAACGTGAACTTC<br>R-CGCAACATAGGATGGAGAGCA        | 60      | 228     |
| <i>endo-Klf4</i>  | F-GTGCCCCGACTAACCGTTG<br>R-GTCGTTGAACTCCTCGGTCT           | 60      | 185     |
| <i>exo-Oct4</i>   | F-TGGTACGGGAAATCACAAGTTTG<br>R-CAATACCTCTGAGCCTGGTC       | 53      | 209     |
| <i>exo-Sox2</i>   | F-GTGTGGTGGTACGGGAAATCAC<br>R-TTCAGCTCCGTCTCCATCATG       | 55      | 73      |
| <i>exo-c-Myc</i>  | F-TGGTACGGGAAATCACAAGTTTG<br>R-GTCATAGTTCCTGTTGGTGAAGTTCA | 55      | 98      |
| <i>exo-Klf4</i>   | F-GTGTGGTGGTACGGGAAATCA<br>R-CGCGAACGTGGAGAAGGA           | 55      | 110     |
| <i>Rex1</i>       | F-AGCAGGATCGCCTCACTG<br>R-GGCCACTTGTCTTTGCCG              | 60      | 188     |
| <i>Gata4</i>      | F-CCTGGAAGACACCCCAATCTC<br>R-AGGTAGTGTCCCGTCCCATCT        | 60      | 116     |
| <i>Mef2c</i>      | F-GATGCAGACGATTCAGTAGG<br>R-TGGTGCCTGCACCGGATGTC          | 60      | 328     |
| <i>Isl1</i>       | F-TGTCAGGAGACTTGCCACTTT<br>R-GCCAAACGTTTATTAGTGAAATAGT    | 60      | 202     |

|                |                                                        |    |     |
|----------------|--------------------------------------------------------|----|-----|
| <i>Myl2</i>    | F-AAAGAGGCTCCAGGTCCAAT<br>R-CCTCTCTGCTTGCGTGGTTA       | 60 | 230 |
| <i>Myl7</i>    | F-CCCATCAACTTCACCGTCTTCCT<br>R-AGAGAACTTGTCTGCCTGGGTCA | 60 | 167 |
| <i>Myh6</i>    | F-GATGCCCAGATGGCTGACTT<br>R-GGTCAGCATGGCCATGTCCT       | 60 | 275 |
| <i>Tnnt2</i>   | F-GCGGAAGAGTGGGAAGAGACA<br>R-CCACAGCTCCTTGGCCTTCT      | 60 | 127 |
| <i>Nppa</i>    | F-GCTTCCAGGCCATATTGGAG<br>R-GGGGGCATGACCTCATCTT        | 60 | 126 |
| <i>Slc8a1</i>  | F-AGGTCCATGCTAGAGATCATCC<br>R-CATCATCGTCATCTTCCCA      | 60 | 300 |
| <i>Gjal</i>    | F-ACAGCTGTTGAGTCAGCTTG<br>R-GAGAGATGGGGAAGGACTTGT      | 60 | 106 |
| <i>Cacna1a</i> | F-CCTGCTGGTGGTTAGCGTG<br>R-TCTGCCTCCGTCTGTTTGGAA       | 60 | 285 |
| <i>Ryr2</i>    | F-ACATCATGTTTTACCGCCTGAG<br>R-TTTGTGGTTATTGAACTCTGGCT  | 60 | 108 |
| <i>Gata1</i>   | F-TGGGGACCTCAGAACCCTTG<br>R-GGCTGCATTTGGGGAAGTG        | 60 | 134 |
| <i>Cbfa2t3</i> | F-CCACGGCTGCTTAAAGTGGT<br>R-GTCATTGCCAAATTGCTGTAGG     | 60 | 226 |
| <i>Myh11</i>   | F-AAGCTGCGGCTAGAGGTCA<br>R-CCCTCCCTTTGATGGCTGAG        | 60 | 238 |
| <i>Mkl2</i>    | F-ATGCCTTGAGGGAAGCAACC<br>R-GCTCGCTCCAGGCTTTTTATC      | 60 | 156 |
| <i>Pecam1</i>  | F-GTCATGGCCATGGTCGAGTA<br>R-CTCCTCGGCATCTTGCTGAA       | 60 | 260 |
| <i>Cdh5</i>    | F-CACTGCTTTGGGAGCCTTC<br>R-GGGGCAGCGATTCATTTTCT        | 60 | 167 |

---

|               |                                                    |    |     |
|---------------|----------------------------------------------------|----|-----|
| <i>Sox17</i>  | F-GCCAAAGACGAACGCAAGCGGT<br>R-TCATGCGCTTCACCTGCTTG | 60 | 211 |
| <i>Afp</i>    | F-GCTCAGCGAGGAGAAATGG<br>R-CTTCACCAGGTTAATGAGAAGC  | 60 | 286 |
| <i>Sox1</i>   | AATCCCCTCTCAGACGGTG<br>TTGATGCATTTTGGGGGTAT        | 60 | 224 |
| <i>Nestin</i> | F-AGAGAAGCGCTGGAACAGAG<br>R-AGGTGTCTGCAACCGAGAGT   | 60 | 234 |
| <i>28s</i>    | F-AGCAGCCGACTTAGAACTGG<br>R-TAGGGACAGTGGGAATCTCG   | 60 | 250 |

---

AT, annealing temperature; PS, product size; F, forward; R, reverse.
