# Supplementary material for: Ascorbic acid enhances the cardiac differentiation of induced pluripotent stem cells through promoting the proliferation of cardiac progenitor cells
Source: Springer Nature journal article supplement (doi:10.1038/cr.2011.195), 2011-12-06
Supplement: 41422_2012_BFcr2011195_MOESM309_ESM.pdf [file 41422_2012_BFcr2011195_MOESM309_ESM.pdf]

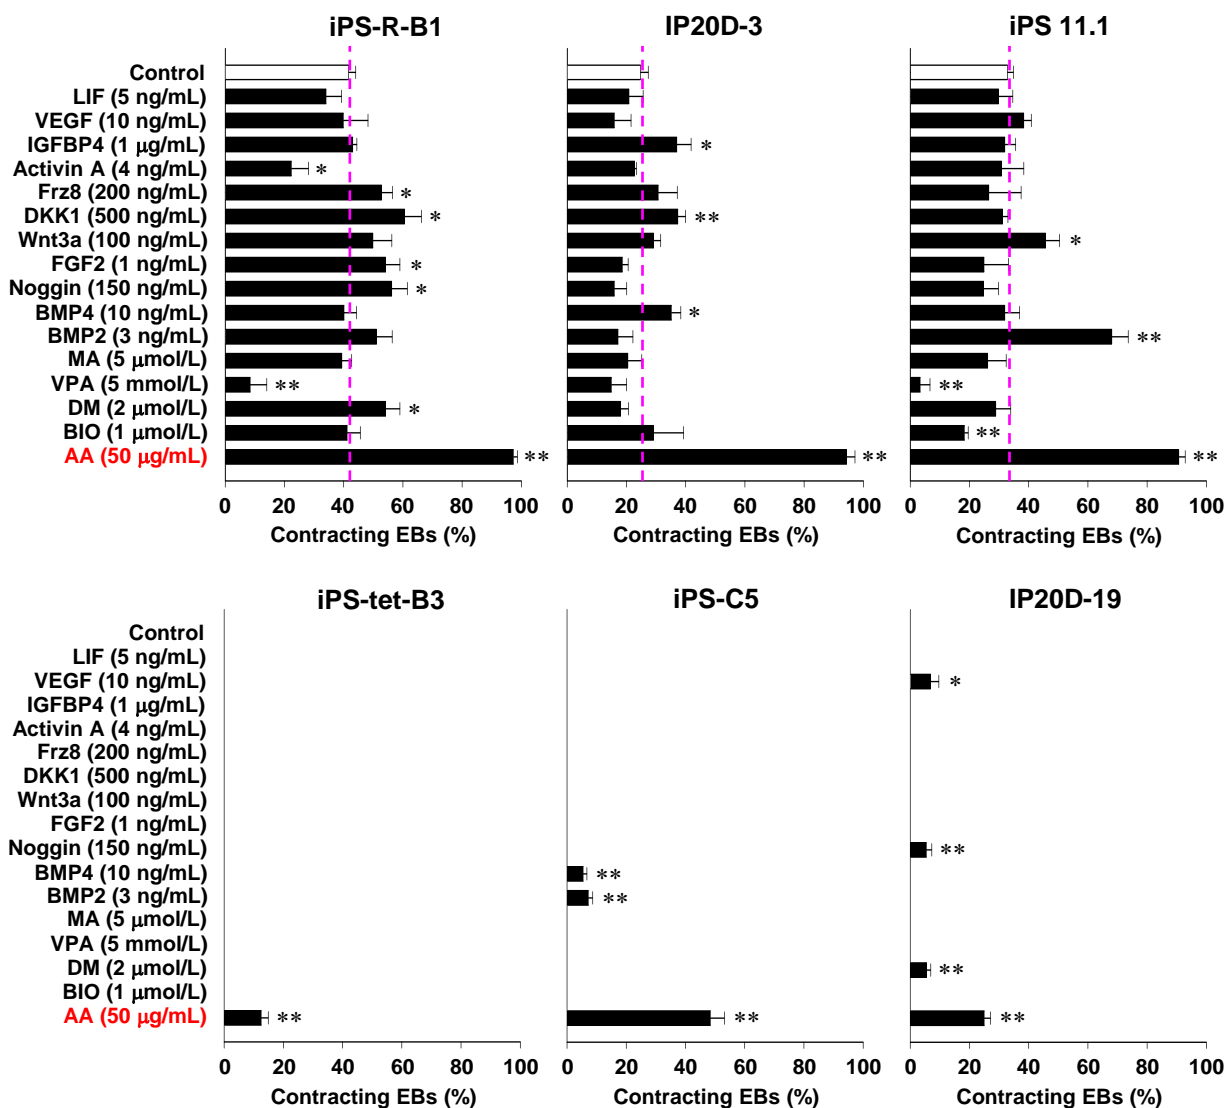

**Supplementary Figure 1** Systematic screening of suitable cardiomyocyte inducers of iPSCs. A, Effect of 16 reported cardiomyocyte inducers in embryonic stem cells (ESCs) on cardiac differentiation of mouse iPSCs (miPSCs). Only AA shows consistent promoting-effect on different iPSC lines. LIF, Leukemia inhibitory factor; VEGF, Vascular endothelial growth factor; IGFBP4, Insulin-like growth factor-binding protein 4; Frz8, Frizzled-8; DKK1, Dickkopf-related protein 1; FGF2, Fibroblast growth factor 2; BMP2 and 4, Bone morphogenetic protein 2 and 4; MA, Methoprene acid, a retinoid X receptors agonist; VPA, Valproic acid; DM, Dorsomorphin; BIO, 6-bromindirubicin-3-oxime. Data are collected at day-10 from three assays and expressed as means  $\pm$  SEM. \* $P < 0.05$ , \*\* $P < 0.01$  vs. control.
