# Supplementary material for: Ascorbic acid enhances the cardiac differentiation of induced pluripotent stem cells through promoting the proliferation of cardiac progenitor cells
Source: Springer Nature journal article supplement (doi:10.1038/cr.2011.195), 2011-12-06
Supplement: 41422_2012_BFcr2011195_MOESM310_ESM.pdf [file 41422_2012_BFcr2011195_MOESM310_ESM.pdf]

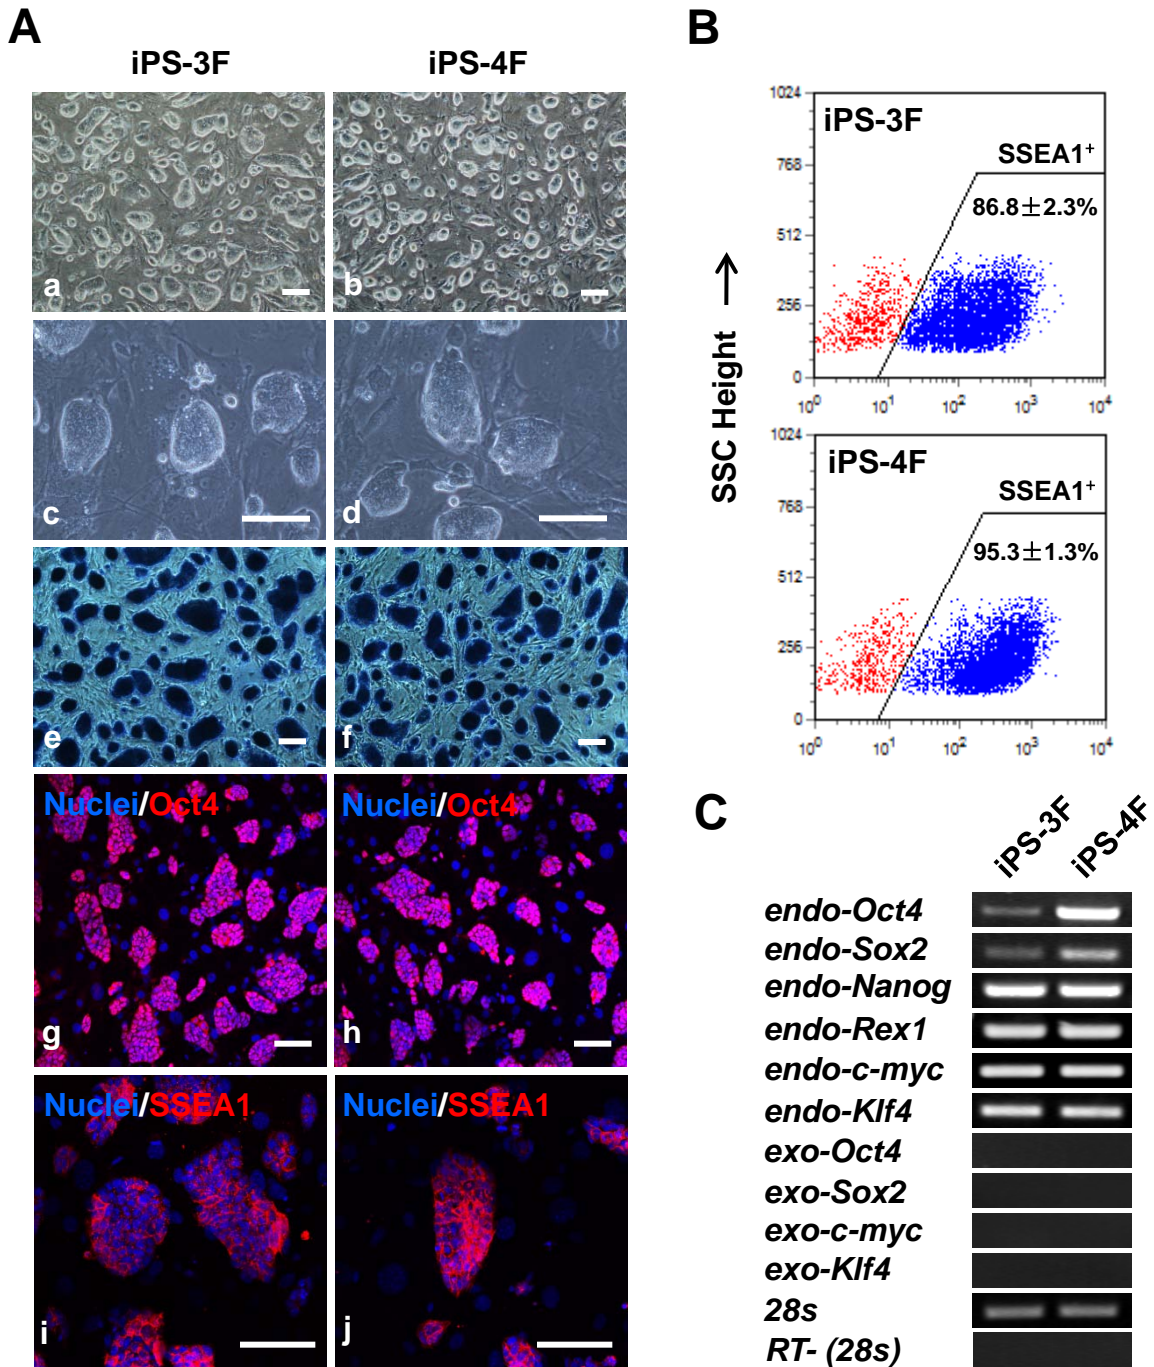

**Supplementary Figure 2** Characteristics of undifferentiated miPSCs. A, Undifferentiated iPS-3F (a, c, e, g, i) and iPS-4F (b, d, f, h, j). a-d, morphology of undifferentiated colonies of iPSC lines iPS-3F and iPS-4F. e-j, iPSCs colonies were positive for pluripotent markers including alkaline phosphatase (e, f), Oct4 (g, h) and SSEA1 (i, j). B, Percentage of SSEA1<sup>+</sup> cells in both iPSC lines (n=3). C, RT-PCR analysis of the expression of pluripotency markers in both iPS-3F and iPS-4F, and exogenous genes were completely silenced. 'endo', endogenous gene expression; 'exo', exogenous gene expression. Scale Bars = 100  $\mu$ m. Nuclei were counterstained with Hoechst33258 (blue).
