# Supplementary material for: Ascorbic acid enhances the cardiac differentiation of induced pluripotent stem cells through promoting the proliferation of cardiac progenitor cells
Source: Springer Nature journal article supplement (doi:10.1038/cr.2011.195), 2011-12-06
Supplement: 41422_2012_BFcr2011195_MOESM311_ESM.pdf [file 41422_2012_BFcr2011195_MOESM311_ESM.pdf]

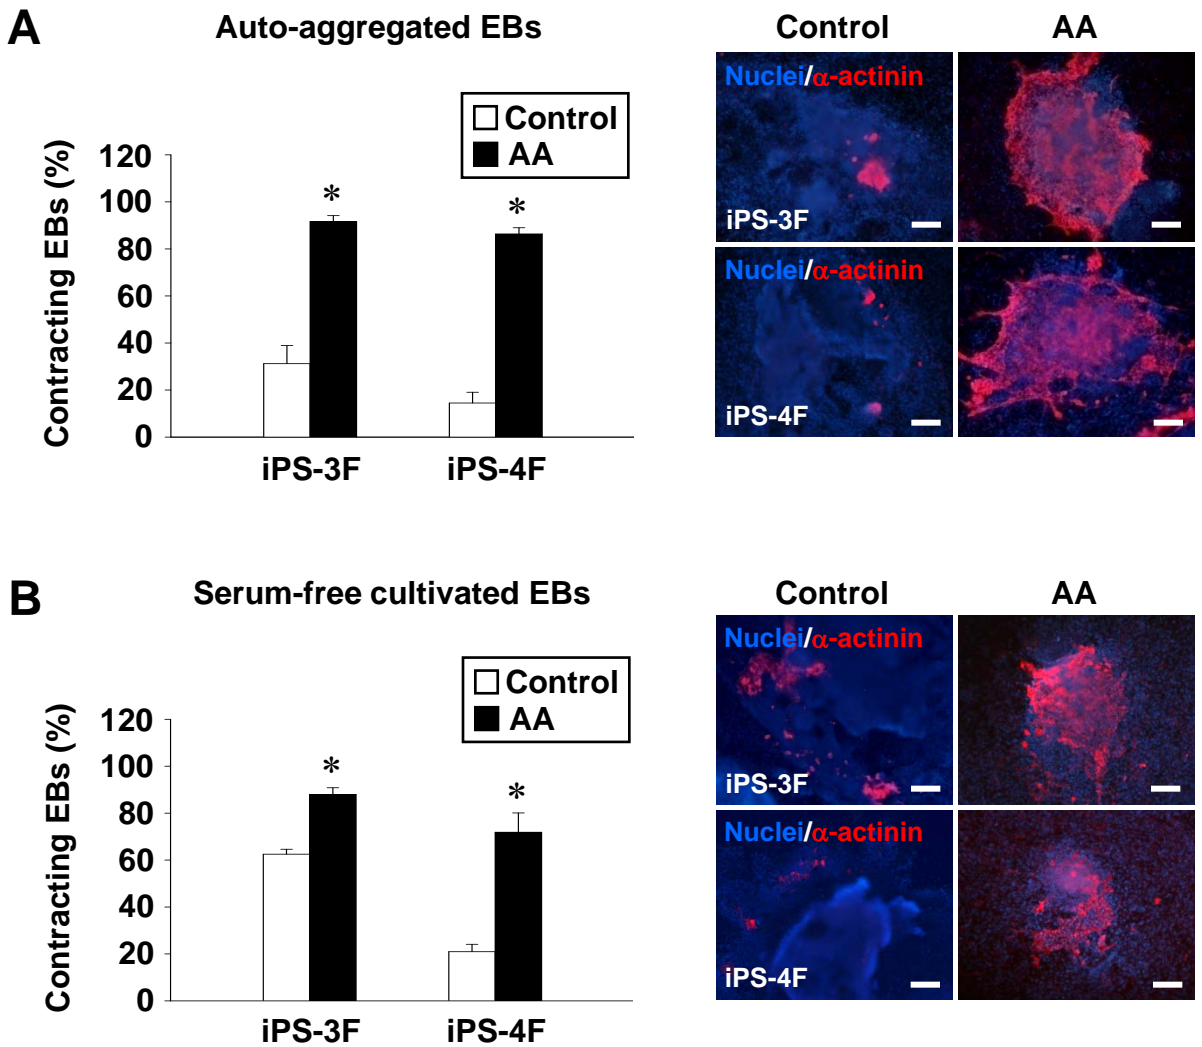

**Supplementary Figure 3** AA enhances cardiac differentiation of iPSCs in auto-aggregated EBs and serum-free cultivated EBs. A and B, AA increased the percentage of contracting EBs (left panel) and content of  $\alpha$ -actinin<sup>+</sup> cardiomyocytes (right panel) in large-scale generated auto-aggregated EBs (A) and serum-free cultured EBs (B). Data are collected at day-10 from three assays and expressed as means  $\pm$  SEM. Scale Bars = 100  $\mu$ m. Nuclei were counterstained with Hoechst33258 (blue). \* $P$ <0.01 vs. control.
