# Supplementary material for: Ascorbic acid enhances the cardiac differentiation of induced pluripotent stem cells through promoting the proliferation of cardiac progenitor cells
Source: Springer Nature journal article supplement (doi:10.1038/cr.2011.195), 2011-12-06
Supplement: 41422_2012_BFcr2011195_MOESM313_ESM.pdf [file 41422_2012_BFcr2011195_MOESM313_ESM.pdf]

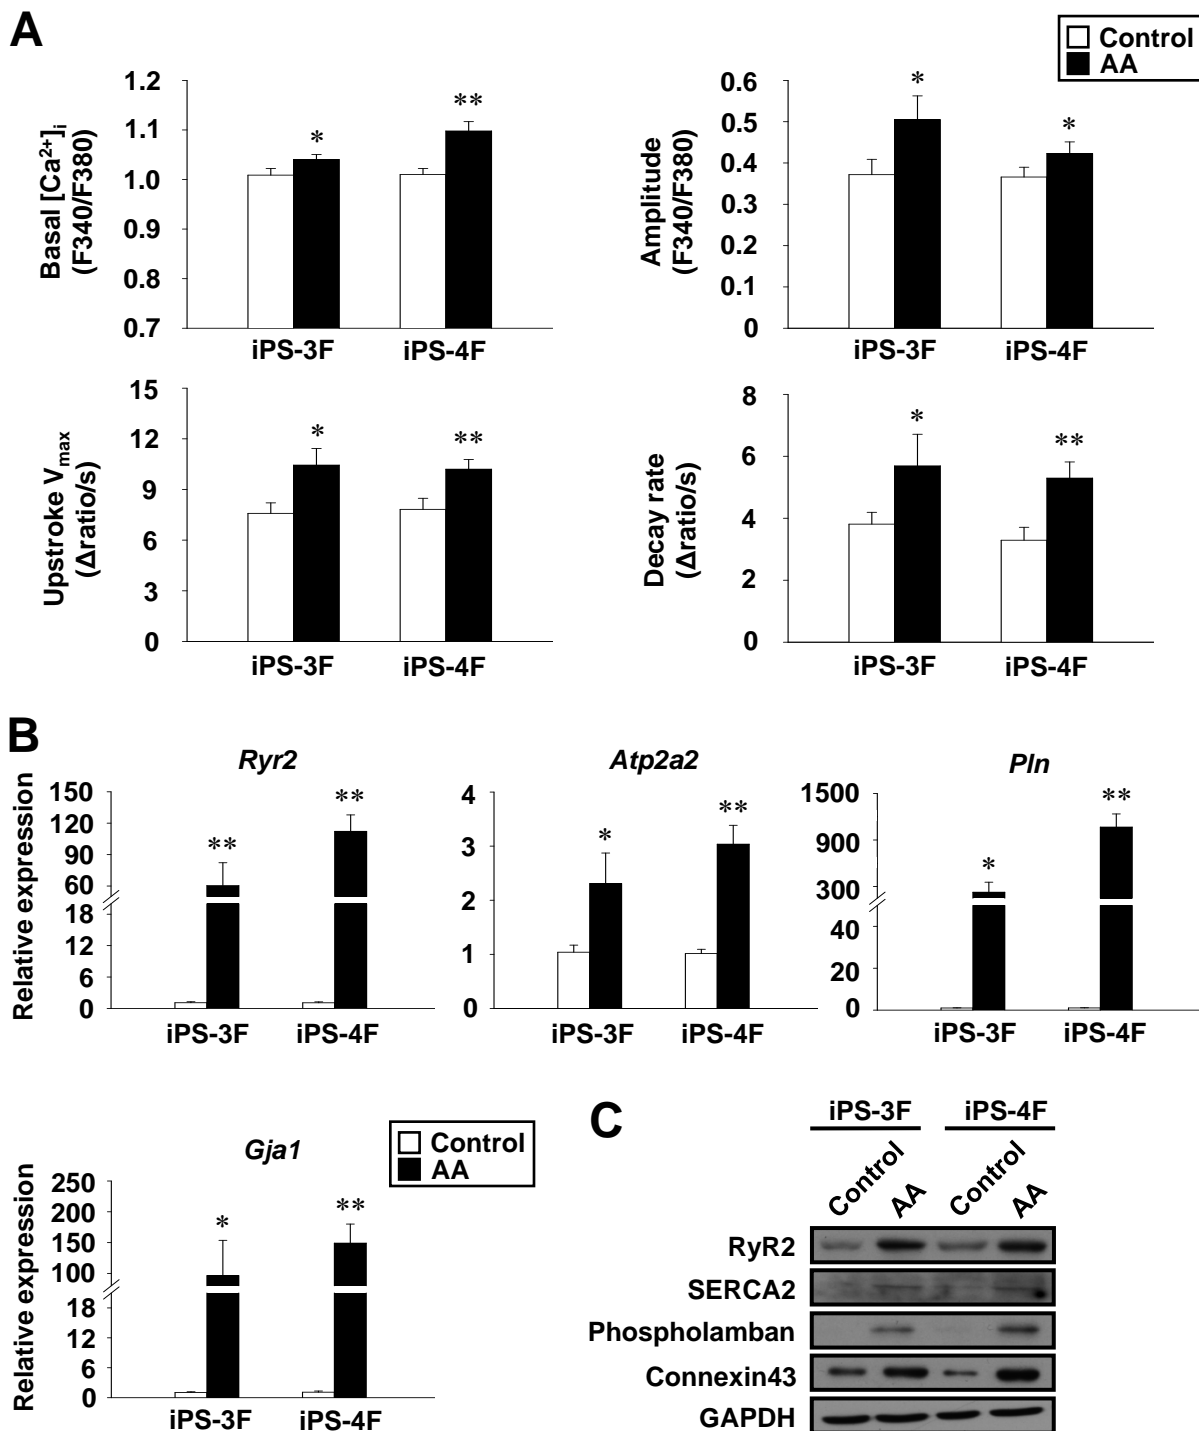

**Supplementary Figure 5**  $\text{Ca}^{2+}$  handling properties of iPS-CMs induced with or without AA. A, Effect of AA on the amplitude, basal  $[\text{Ca}^{2+}]_i$ , upstroke  $V_{\max}$ , and decay rate of  $\text{Ca}^{2+}$  transients in day 16-18 iPS-CMs ( $n=12-13$ ). B and C, AA increases the expression of  $\text{Ca}^{2+}$  handling and gap junction proteins in TMRM fluorescent dye sorted iPS-CMs. Quantitative RT-PCR (B) and Western blot (C) analysis of the relative expression levels of various  $\text{Ca}^{2+}$  handling proteins in day-18 iPS-CMs with or without AA treatment. Results were obtained from three assays and expressed as means  $\pm$  SEM. \* $P < 0.05$ , \*\* $P < 0.01$  vs. control.
