# Supplementary material for: Ascorbic acid enhances the cardiac differentiation of induced pluripotent stem cells through promoting the proliferation of cardiac progenitor cells
Source: Springer Nature journal article supplement (doi:10.1038/cr.2011.195), 2011-12-06
Supplement: 41422_2012_BFcr2011195_MOESM314_ESM.pdf [file 41422_2012_BFcr2011195_MOESM314_ESM.pdf]

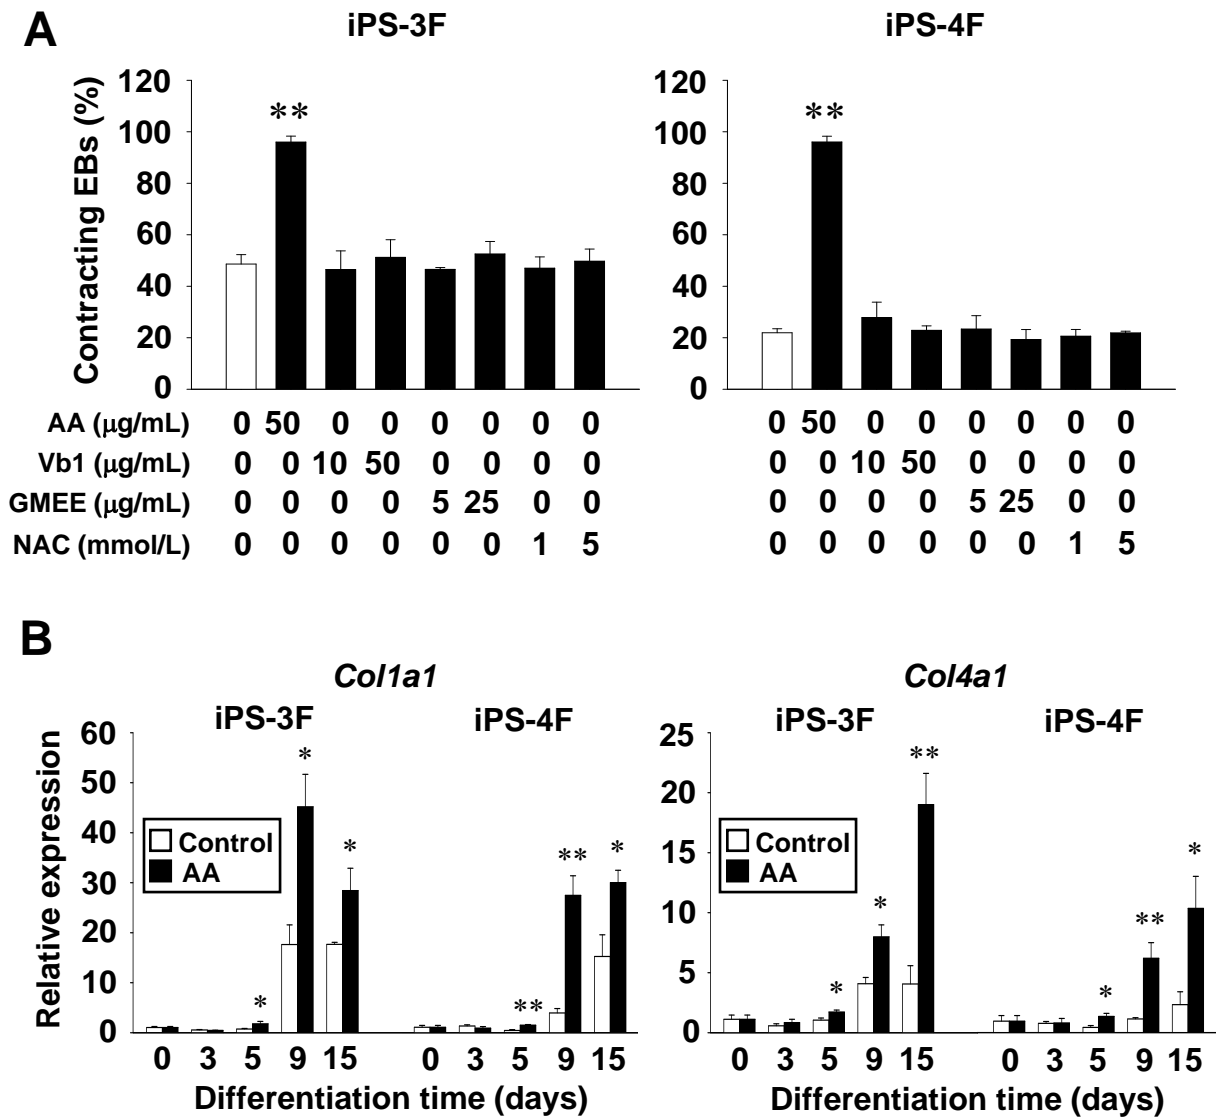

**Supplementary Figure 6** AA-promoted cardiogenesis is independent of its antioxidative property. A, Antioxidants including vitamin B1 (Vb1), reduced glutathione (GMEE), and N-acetyl-L-cysteine (NAC) failed to mimic the role of AA in promoting cardiomyocyte differentiation. B, Quantitative RT-PCR analysis of the relative expression of collagen genes *Col1a1* and *Col4a1*. Data are collected from three experiments and expressed as means  $\pm$  SEM. \* $P < 0.05$ , \*\* $P < 0.01$  vs. control.
