# Supplementary material for: Ascorbic acid enhances the cardiac differentiation of induced pluripotent stem cells through promoting the proliferation of cardiac progenitor cells
Source: Springer Nature journal article supplement (doi:10.1038/cr.2011.195), 2011-12-06
Supplement: 41422_2012_BFcr2011195_MOESM316_ESM.pdf [file 41422_2012_BFcr2011195_MOESM316_ESM.pdf]

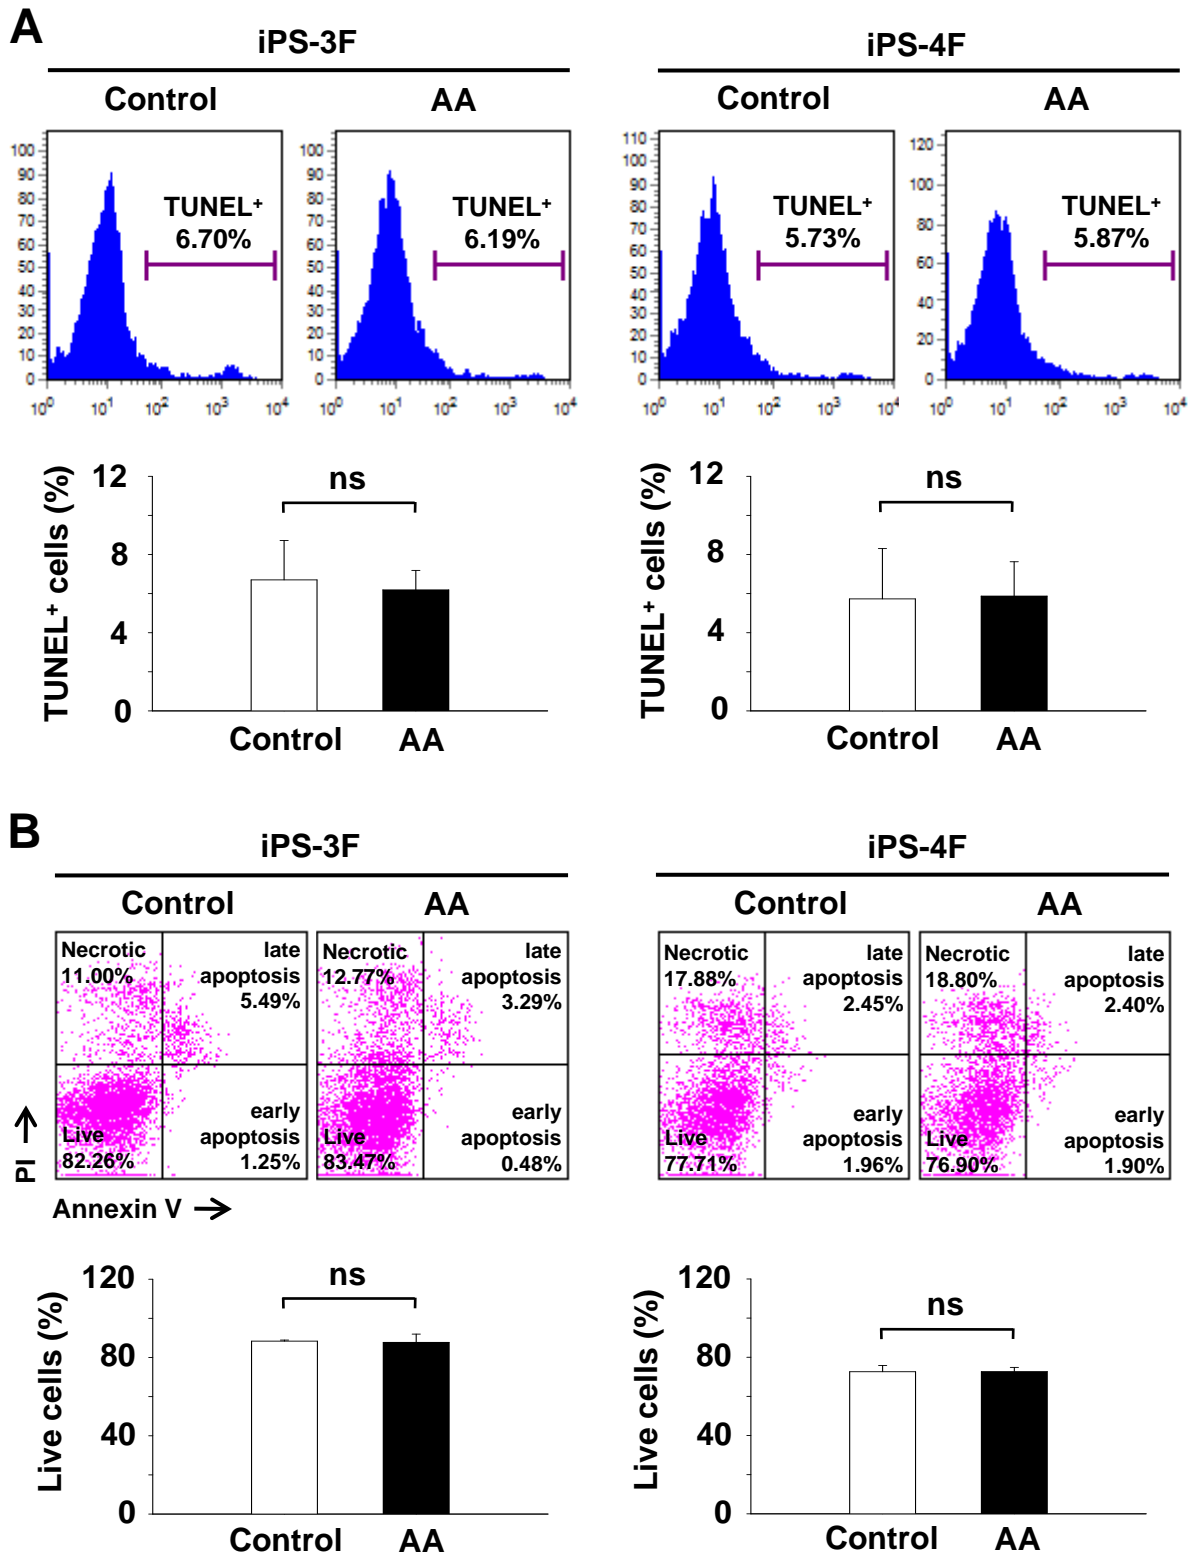

**Supplementary Figure 8** AA does not influence the apoptotic statuses of differentiating iPSCs. A and B, TUNEL (A) and Annexin V-PI (B) staining analysis showed apoptotic and necrosis indexes of both iPSC lines at differentiation day-5. Data are collected from three experiments and expressed as means  $\pm$  SEM. ns, no significant difference.
